# Supplementary material
Source: PubMed Central journal article supplement (PMC7423166)
Supplement: NIHMS1535774-supplement-mmc1.pdf [file NIHMS1535774-supplement-mmc1.pdf]

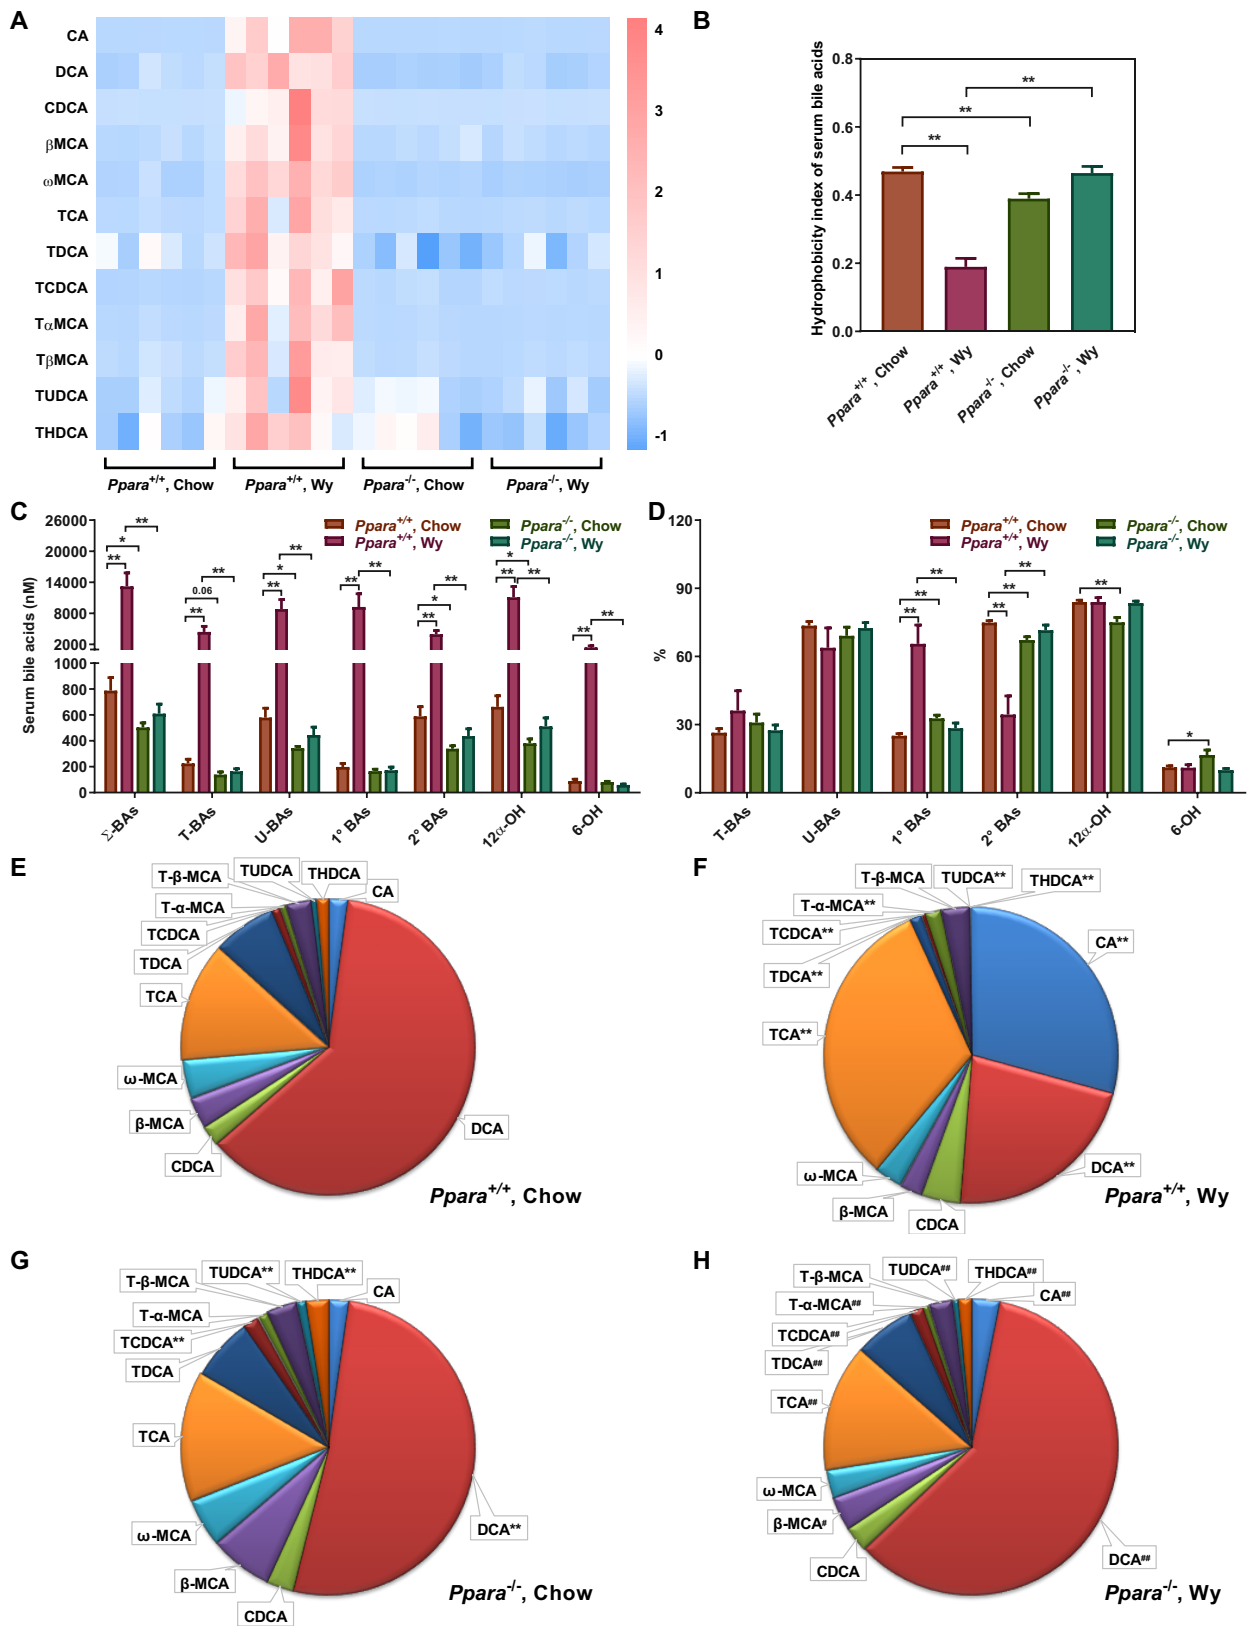

Supplementary Figure 1. Effect of Wy on serum BA composition in *Ppara*<sup>+/+</sup> and *Ppara*<sup>-/-</sup> mice.

A. Heat map of individual BA levels. B. Hydrophobicity index of serum bile acids. C. Total

concentration of different BA classes. D. Relative percentage of different BA classes to total BAs. E. Relative fraction of individual BAs in serum of chow-treated *Ppara*<sup>+/+</sup> mice. F. Relative fraction of individual BAs in serum of Wy-treated *Ppara*<sup>+/+</sup> mice. G. Relative fraction of individual BAs in serum of chow-treated *Ppara*<sup>-/-</sup> mice. H. Relative fraction of individual BAs in serum of Wy-treated *Ppara*<sup>-/-</sup> mice. *n* = 6/group.  $\Sigma$ -BAs, total BAs. T-BAs, taurine-conjugated BAs. U-BAs, unconjugated BAs. 1° BAs, primary BAs. 2° BAs, secondary BAs. 12 $\alpha$ -OH, 12 $\alpha$ -hydroxylated BAs. 6-OH, 6-hydroxylated BAs. Data are presented as mean  $\pm$  SEM; *n* = 6/group. \**P* < 0.05 or \*\**P* < 0.01, by one-way ANOVA followed by Tukey's *post-hoc* correction.

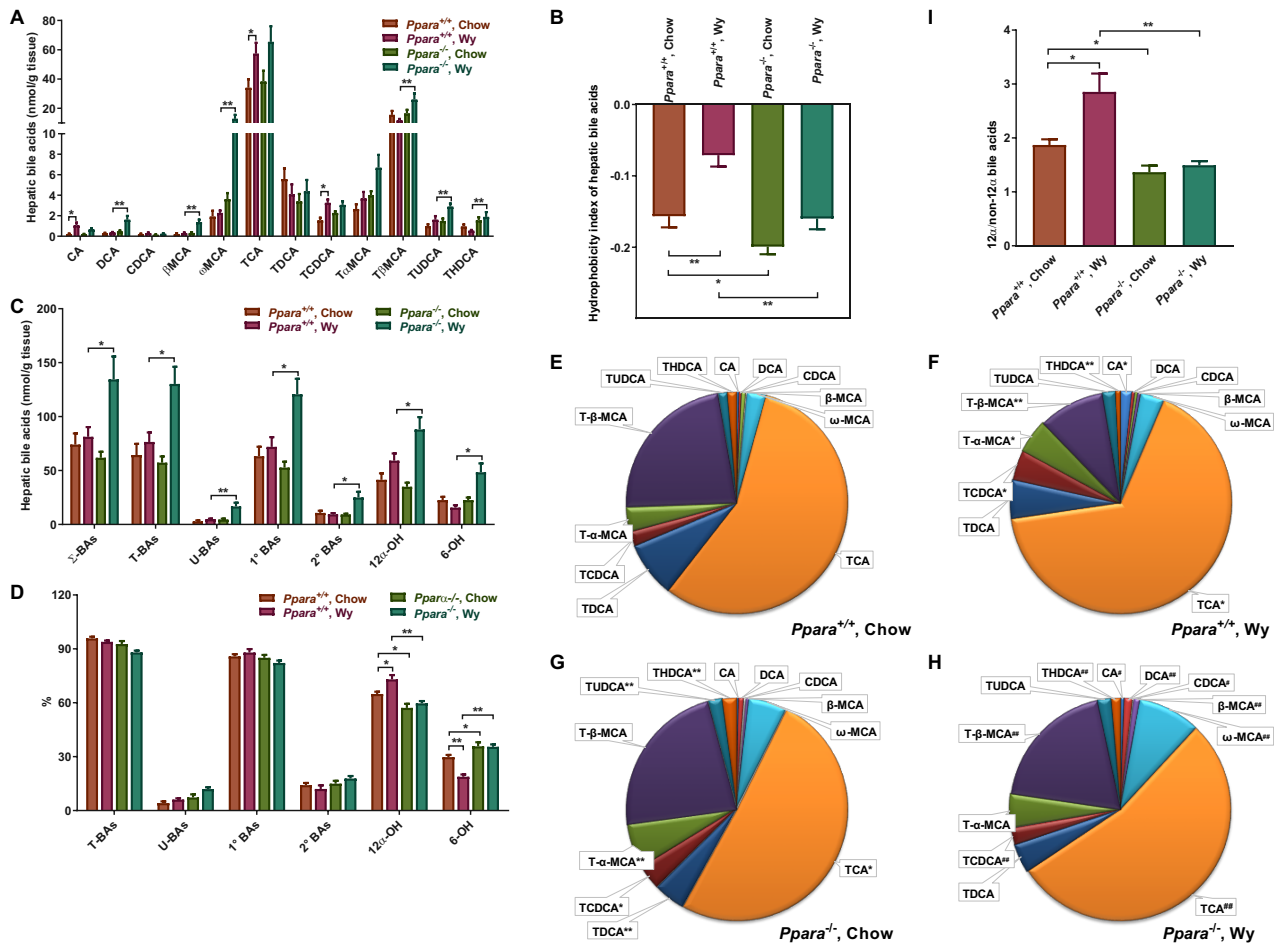

**Supplementary Figure 2. Determination of BA concentrations in the liver of chow- and Wy-treated  $Ppara^{+/+}$  and  $Ppara^{-/-}$  mice.** A. Heat map of individual BA levels. B. Hydrophobicity index of hepatic BAs. C. Total concentration of different BA classes. D. Relative percentage of different BA classes to total BAs. E. Relative fraction of individual BAs in livers of chow-treated  $Ppara^{+/+}$  mice. F. Relative fraction of individual BAs in livers of Wy-treated  $Ppara^{fl/fl}$  mice. G. Relative fraction of individual BAs in livers of chow-fed  $Ppara^{-/-}$  mice. H. Relative fraction of individual BAs in livers of Wy-treated  $Ppara^{-/-}$  mice. I.  $12\alpha$ -OH/non- $12\alpha$ -OH BAs ratio.  $\Sigma$ -BAs, total BAs. T-BAs, taurine-conjugated BAs. U-BAs, unconjugated BAs.  $1^\circ$  BAs, primary BAs.  $2^\circ$  BAs, secondary BAs.  $12\alpha$ -OH,  $12\alpha$ -hydroxylated BAs. 6-OH, 6-hydroxylated BAs. Data are presented as mean  $\pm$  SEM;  $n = 6$ /group. \* $P < 0.05$  or \*\* $P < 0.01$ , by one-way ANOVA followed by Tukey's *post-hoc* correction.

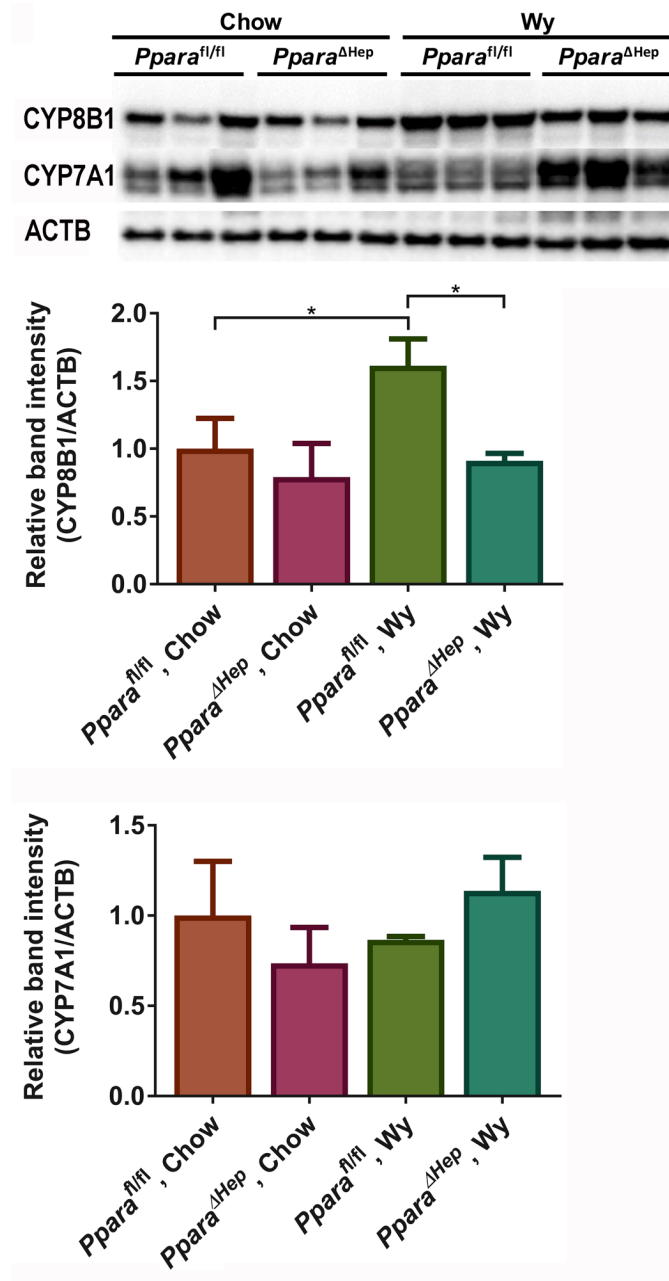

**Supplementary Figure 3. The effects of Wy treatment on CYP8B1 and CYP7A1 proteins in *Ppara*<sup>fl/fl</sup> and *Ppara*<sup>ΔHep</sup> mice.** Western blot analysis of CYP8B1 and CYP7A1 was carried out. Data are presented as mean ± SEM; *n* = 3/group. \**P* < 0.05 by one-way ANOVA followed by Tukey's *post-hoc* correction.



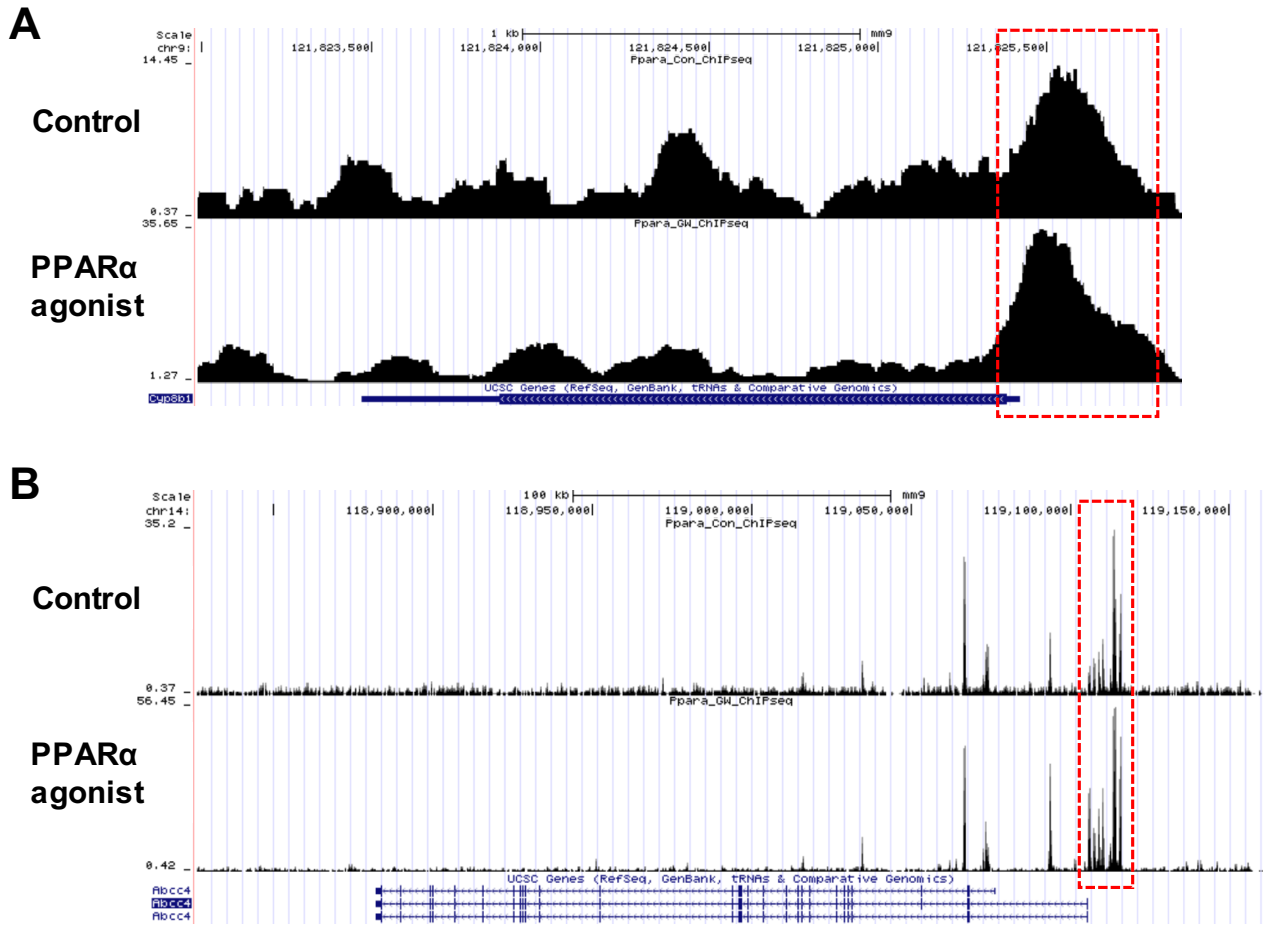

**Supplementary Figure 4. PPAR $\alpha$  binds to promoters of genes involved in BA homeostasis. A.** Potential PPAR $\alpha$  binding site in the *Cyp8b1* promoter. **B.** Potential PPAR $\alpha$  binding site in *Abcc4* promoter. ChIP-seq data were obtained from the NIH GEO database (GSE61817). PPAR $\alpha$  ChIP-seq data was analyzed and raw reads mapped to the genome. Mice were treated with control or the PPAR $\alpha$  agonist Wy. The gene transcription direction is indicated by the arrow, and the beginning of the arrow denotes the transcription start site. The red box indicates the binding peaks found within the promoter region containing the transcription start site (TSS).

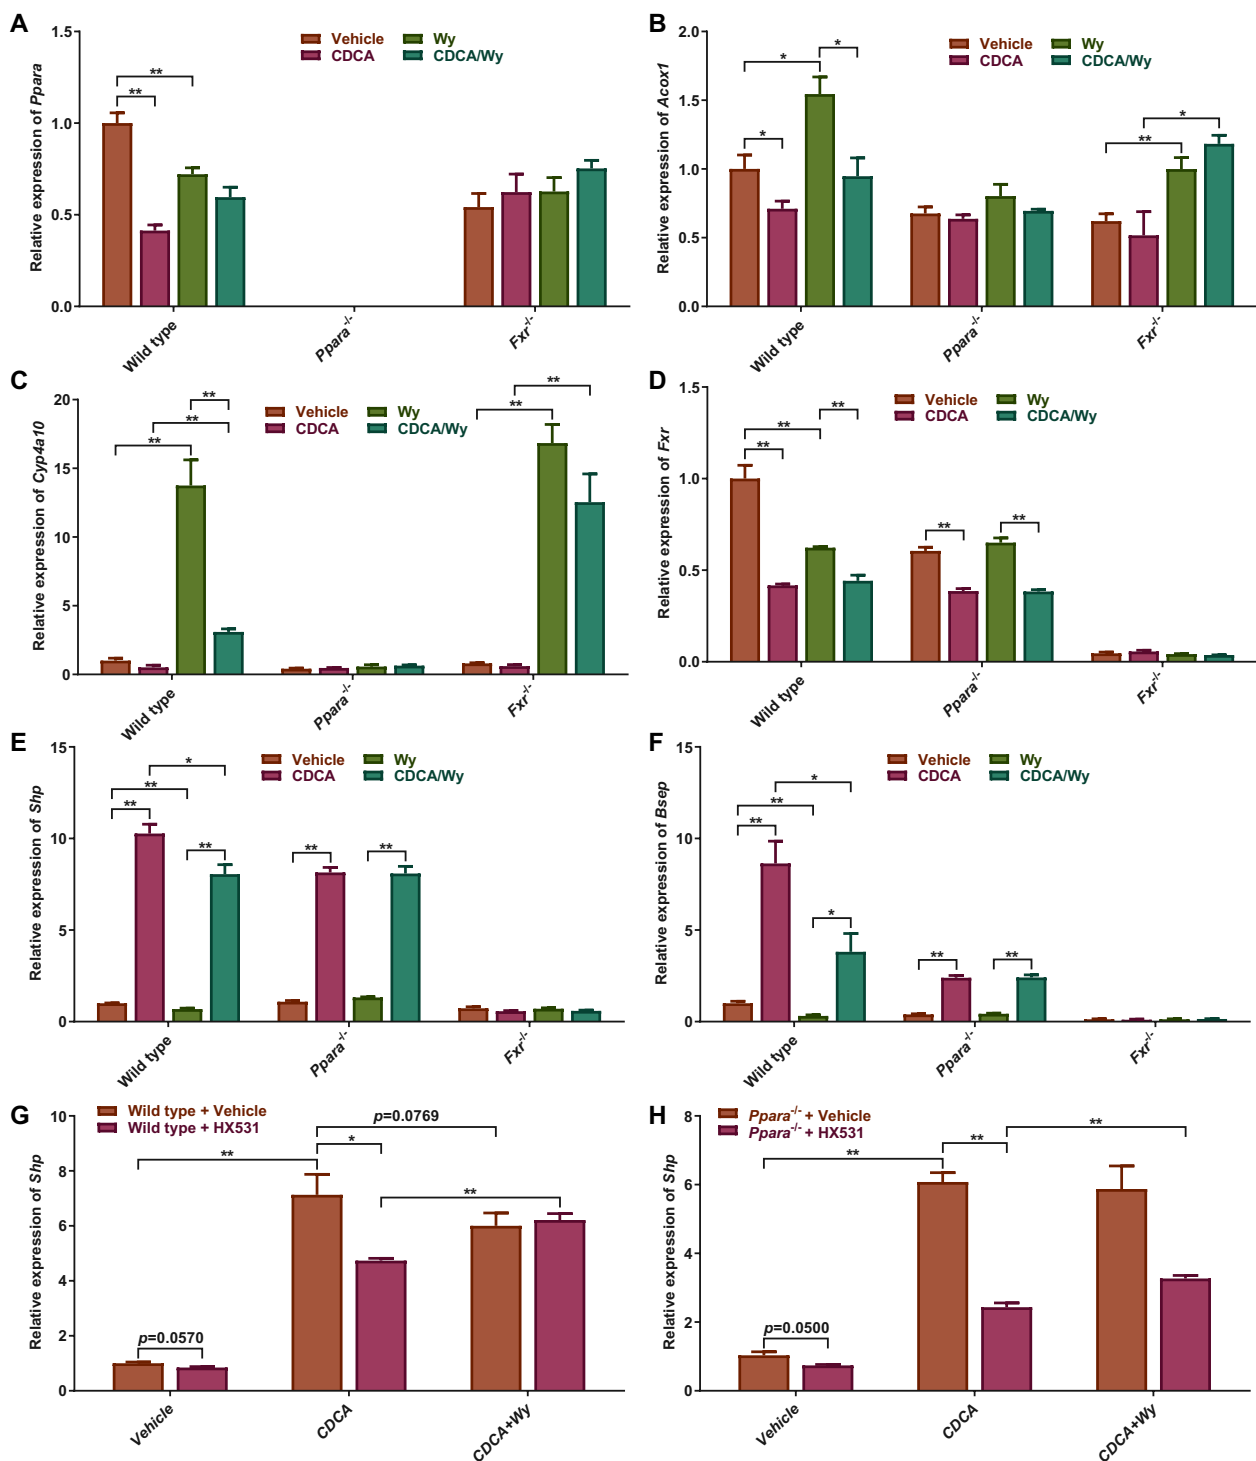

**Supplementary Figure 5. The crosstalk between PPAR $\alpha$  and FXR in primary hepatocytes. A.** mRNA expression of *Ppara*. **B.** mRNA expression of PPAR $\alpha$  target gene *Acox1*. **C.** mRNA expression of PPAR $\alpha$  target gene *Cyp4a10*. **D.** mRNA expression of *Fxr*. **E.** mRNA expression of FXR target gene *Shp*. **F.** mRNA expression of FXR target gene *Bsep*. **A-F.** The primary hepatocytes were isolated from wild type, *Ppara*<sup>-/-</sup> and *Fxr*<sup>-/-</sup> mice treated with vehicle, CDCA, Wy, and

CDCA/Wy. Data are presented as mean  $\pm$  SEM;  $n = 4$ /group. G. mRNA expression of FXR target gene *Shp* in wild type primary hepatocytes treated with vehicle, CDCA, and CDCA/Wy. H. mRNA expression of FXR target gene *Bsep* in *Ppara*<sup>-/-</sup> primary hepatocytes treated with vehicle, CDCA, and CDCA/Wy. Data are presented as mean  $\pm$  SEM;  $n = 3$ /group. \* $P < 0.05$  or \*\* $P < 0.01$ , by one-way ANOVA followed by Tukey's *post-hoc* correction.

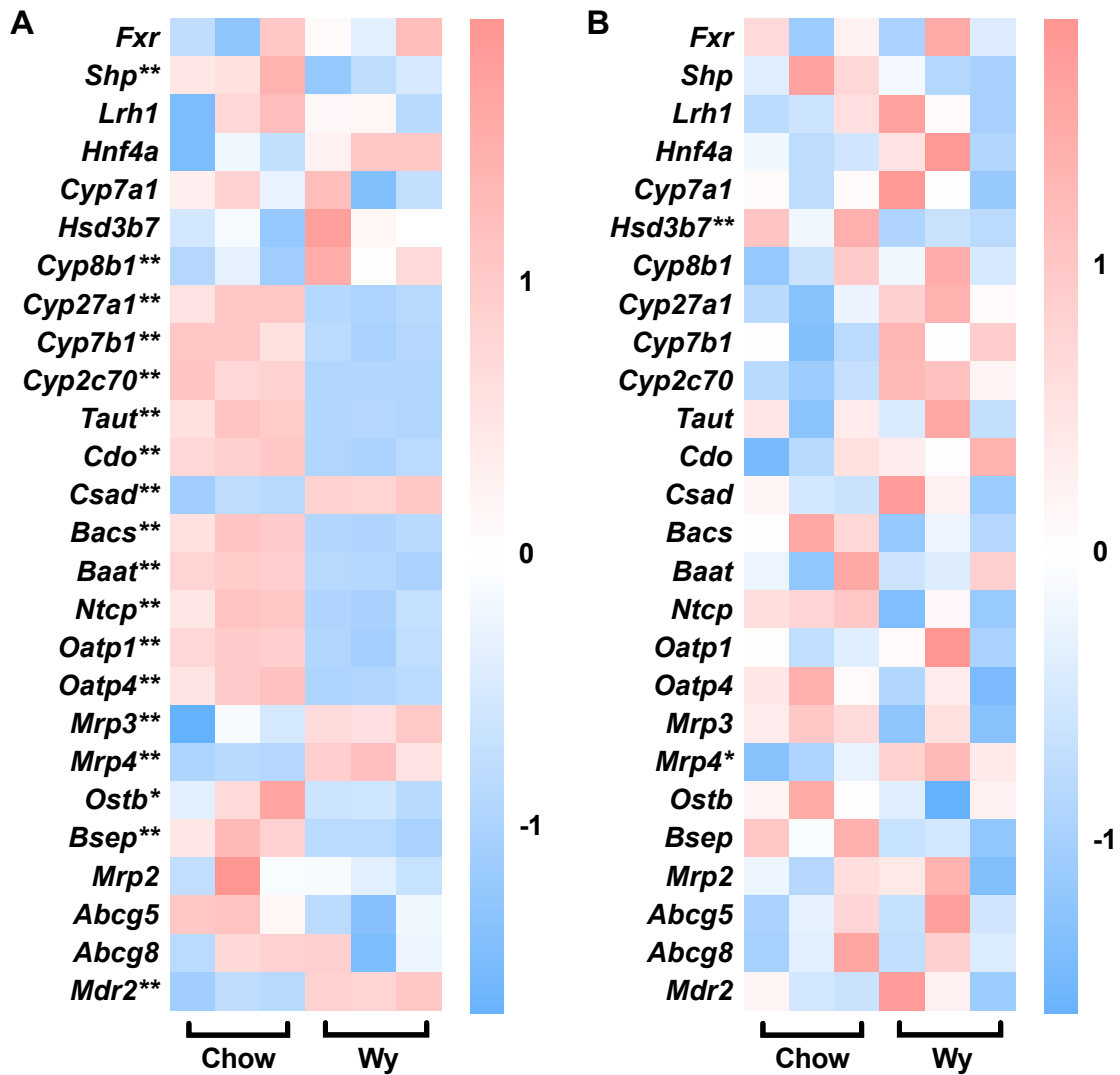

**Supplementary Figure 6. Heat map of RNA-seq analysis showed 48-hour Wy treatment alters hepatic expression profiles of genes involved in BA homeostasis. A. chow- and Wy-treated *Ppara*<sup>+/+</sup> mice. B. chow- and Wy-treated *Ppara*<sup>-/-</sup> mice. \**Q* (FDR-adjusted *P* value) < 0.05 or \*\**Q* < 0.01, was determined by two-tailed Wilcoxon signed rank test.**

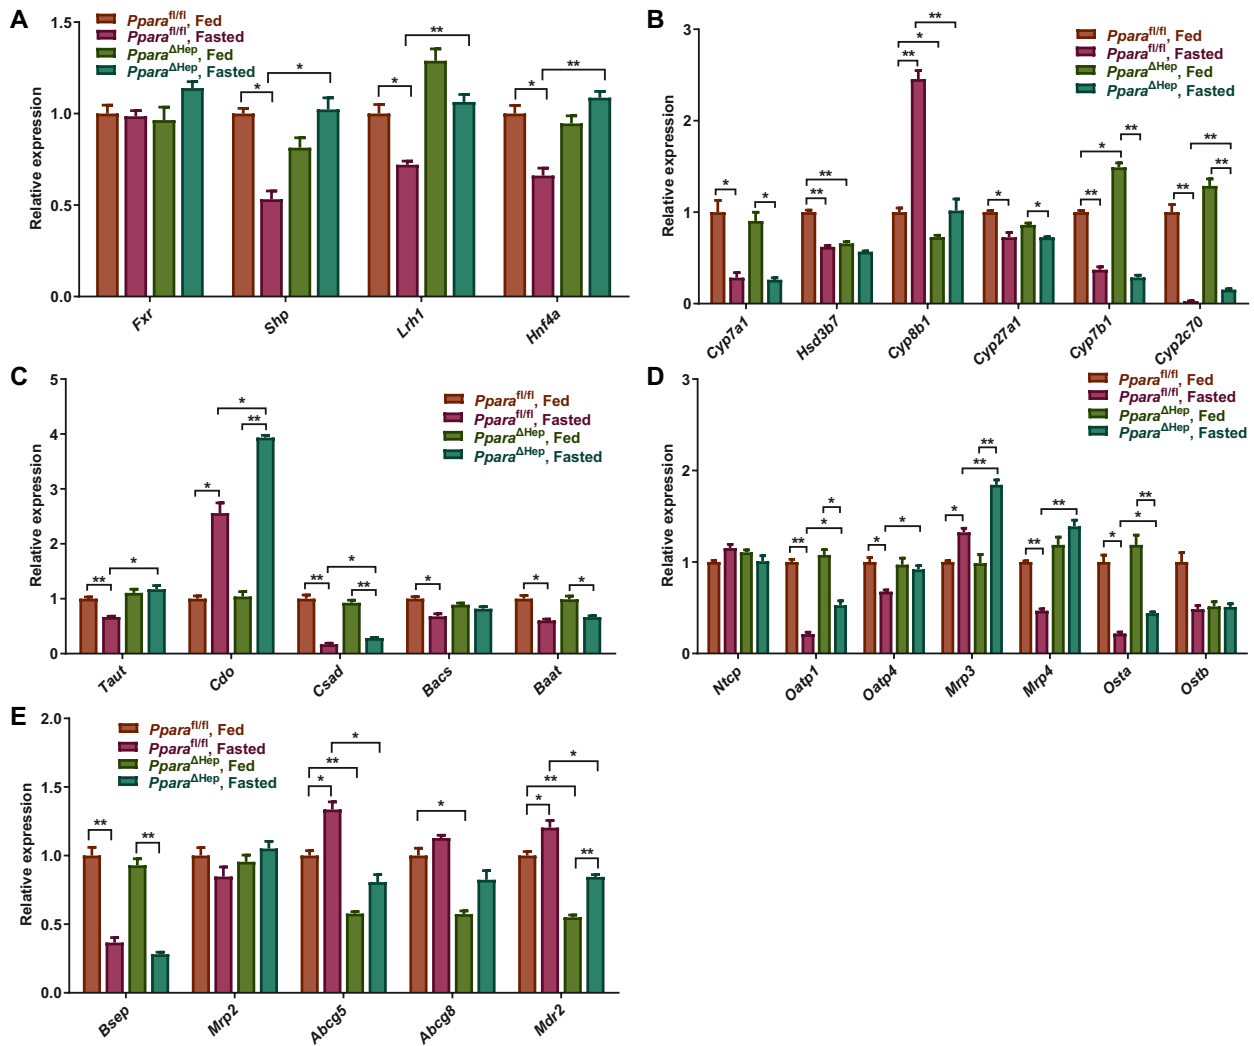

**Supplementary Figure 7. Fasting alters hepatic expression of genes involved in BA synthesis, conjugation, and transport.** A. mRNA expression of PPAR $\alpha$  and its target genes. B. mRNA levels of genes involved in BA synthesis. C. mRNA levels of genes involved in taurine conjugation. D. mRNA levels of genes related to the BA sinusoidal transporters. E. mRNA levels of genes related to the BA canalicular transporters. Data are presented as mean  $\pm$  SEM;  $n = 6$ /group. \* $P < 0.05$  or \*\* $P < 0.01$ , by one-way ANOVA followed by Tukey's *post-hoc* correction.

**Supplementary Table 1. Primer list**

| <b>Gene</b>    | <b>Forward primer sequence (5'→3')</b> | <b>Reverse primer sequence (5'→3')</b> |
|----------------|----------------------------------------|----------------------------------------|
| <i>Gapdh</i>   | AGGTCGGTGTGAACGGATTTG                  | TGTAGACCATGTAGTTGAGGTCA                |
| <i>Abcg5</i>   | AGGGCCTCACATCAACAGAG                   | GCTGACGCTGTAGGACACAT                   |
| <i>Abcg8</i>   | CTGTGGAATGGGACTGTACTTC                 | GTTGGACTGACCACTGTAGGT                  |
| <i>Bacs</i>    | TCTATGGCCTAAAGTTCAGGCG                 | CTTGCCGCTCTAAAGCATCC                   |
| <i>Baat</i>    | GGAAACCTGTTAGTTCTCAGGC                 | GTGGACCCCATATAGTCTCC                   |
| <i>Bsep</i>    | TCTGACTCAGTGATTCTTCGCA                 | GTGTAGAGTGAAGTCCTCCTTAGC               |
| <i>Cdo</i>     | GGGGACGAAGTCAACGTGG                    | ACCCACAGCACAGAATCATCAG                 |
| <i>Csd</i>     | CCAGGACGTGTTTGGGATTGT                  | ACCAGTCTTGACACTGTAGTGA                 |
| <i>Cyp2c70</i> | TGGCTTTCTCAGCAGGAAGAA                  | AACTGGCTTGGTGTGCGATGT                  |
| <i>Cyp27a1</i> | CTGCACTTCTGCTGACCAAT                   | TGTCAGTGTGTTGGATGTCGTG                 |
| <i>Cyp7a1</i>  | AACAACCTGCCAGTACTAGATAGC               | GTGTAGAGTGAAGTCCTCCTTAGC               |
| <i>Cyp7b1</i>  | GGAGCCACGACCCTAGATG                    | TGCCAAGATAAGGAAGCCAAC                  |
| <i>Cyp8b1</i>  | CTAGGGCCTAAAGGTTTCGAGT                 | GTAGCCGAATAAGCTCAGGAAG                 |
| <i>Fxr</i>     | TGGGCTCCGAATCCTCTTAGA                  | TGGTCCTCAAATAAGATCCTTGG                |
| <i>Hnf4</i>    | GGTTTAGCCGACAATGTGTGG                  | TCCCGCTCATTTTGGACAGC                   |
| <i>Hsd3b7</i>  | CGCCCTGGGACTTACTACAG                   | CGAACAATATGTTCCCCCAG                   |
| <i>Lrh1</i>    | TGAGGAACAACCTCCGGGAAAA                 | CAGACACTTTATCGCCACACA                  |
| <i>Mdr1</i>    | CCCCCGAGATTGACAGCTAC                   | ACTCCACTAAATTGCACATTCCTTC              |
| <i>Mdr2</i>    | CTACGACCCACAGAGGGTA                    | ACGGGCTCTTGACTTACCAC                   |
| <i>Mrp2</i>    | GTGTGGATTCCCTTGGGCTTT                  | CACAACGAACACCTGCTTGG                   |
| <i>Mrp3</i>    | GGGCTCCAAGTTCTGGGAC                    | CCGTCTTGAGCCTGGATAAC                   |
| <i>Mrp4</i>    | AGCTTCAACGGTACTGGGATA                  | TCGTGCGGGTCATACTTCTC                   |
| <i>Ntcp</i>    | CAAACCTCAGAAGGACCAAACA                 | GTAGGAGGATTATTCCTGTTGTG                |
| <i>Oapt1</i>   | ACTCCCATAATGCCCTTGG                    | TAATCGGGCCAACAATCTTC                   |
| <i>Oatp4</i>   | ACCAAACCTCAGCATCCAAGC                  | TAGCTGAATGAGAGGGGCTGC                  |
| <i>Osta</i>    | GGCATCTATGACCCAGGAGA                   | TGGATCCCATGTTCTGTTCA                   |
| <i>Ostb</i>    | GACCACAGTGCAGAGAAAGC                   | ATTCCAAGGAGCCGCATCT                    |
| <i>Shp</i>     | TCTGCAGGTCGTCCGACTATTC                 | AGGCAGTGGCTGTGAGATGC                   |
| <i>Taut</i>    | GCACACGGCCTGAAGATGA                    | ATTTTTGTAGCAGAGGTACGGG                 |

**Supplementary Table 2. Summary of serum concentration and composition of grouped BAs in *Ppara*<sup>fl/fl</sup> and *Ppara*<sup>ΔHep</sup> mice**

|                        | Concentration, nM             |              |                              |             | Percentage, %                 |            |                              |             |
|------------------------|-------------------------------|--------------|------------------------------|-------------|-------------------------------|------------|------------------------------|-------------|
|                        | <i>Ppara</i> <sup>fl/fl</sup> |              | <i>Ppara</i> <sup>ΔHep</sup> |             | <i>Ppara</i> <sup>fl/fl</sup> |            | <i>Ppara</i> <sup>ΔHep</sup> |             |
|                        | Chow                          | Wy           | Chow                         | Wy          | Chow                          | Wy         | Chow                         | Wy          |
| Total BAs              | 817±122                       | 10100±2050** | 630±71                       | 628±94###   | 100                           | 100        | 100                          | 100         |
| Total conjugated BAs   | 206±27                        | 2270±664*    | 201±66                       | 183±17###   | 24.5±4.8                      | 22.9±6.7   | 30.3±7.3                     | 30.4±2.4    |
| Total unconjugated BAs | 649±99                        | 7850±1980**  | 428±61                       | 445±80###   | 75.5±4.8                      | 77.1±6.7   | 69.7±7.3                     | 69.6±2.4    |
| Total primary BAs      | 196±30                        | 6200±3060**  | 183±43                       | 183±59.2#   | 32.2±4.7                      | 60.1±4.2** | 28.3±4.3                     | 29.9±1.8### |
| Total secondary BAs    | 575±73                        | 3920±897*    | 446±51                       | 444±72###   | 67.8±4.7                      | 39.9±4.2** | 71.7±4.3                     | 70.1±1.8### |
| Total 12α-OH BAs       | 664±93                        | 7320±1340**  | 516±59                       | 501±82###   | 81.8±1.2                      | 80.8±1.6   | 82.0±0.8                     | 79.0±1.3    |
| Total 6-OH BAs         | 150±62                        | 1240±246*    | 80.6±9.0                     | 72.5±8.4### | 12.6±1.3                      | 12.7±1.9   | 11.5±0.6                     | 11.9±0.8    |

Data are presented as mean ± SEM; *n* = 6/group. \**P* < 0.05 or \*\**P* < 0.01, versus chow-treated *Ppara*<sup>fl/fl</sup> group, #*P* < 0.05 or ###*P* < 0.01, versus Wy-treated *Ppara*<sup>fl/fl</sup> group, by one-way ANOVA followed by Tukey's *post-hoc* correction.

**Supplementary Table 3. Summary of serum concentration and composition of grouped BAs in *Ppara*<sup>+/+</sup> and *Ppara*<sup>-/-</sup> mice**

|                           | Concentration, nM           |              |                             |            | Percentage, %               |            |                             |             |
|---------------------------|-----------------------------|--------------|-----------------------------|------------|-----------------------------|------------|-----------------------------|-------------|
|                           | <i>Ppara</i> <sup>+/+</sup> |              | <i>Ppara</i> <sup>-/-</sup> |            | <i>Ppara</i> <sup>+/+</sup> |            | <i>Ppara</i> <sup>-/-</sup> |             |
|                           | Chow                        | Wy           | Chow                        | Wy         | Chow                        | Wy         | Chow                        | Wy          |
| Total BAs                 | 788±100                     | 13200±2600** | 503±35*                     | 610±74###  | 100                         | 100        | 100                         | 100         |
| Total conjugated BAs      | 225±30                      | 4410±1070**  | 138±20                      | 165±20##   | 26.4±1.8                    | 36.2±8.8   | 30.9±3.8                    | 27.5±2.4    |
| Total unconjugated BAs    | 579±72                      | 8810±1860**  | 342±14**                    | 445±61##   | 73.6±1.8                    | 63.8±8.8   | 69.1±3.8                    | 72.5±2.4    |
| Total primary BAs         | 198±27                      | 9240±2540**  | 165±15                      | 173±24##   | 25.1±0.9                    | 65.6±8.2** | 32.7±1.4**                  | 28.4±2.3### |
| Total secondary BAs       | 589±75                      | 3980±694**   | 338±23**                    | 437±56##   | 74.9±0.9                    | 34.4±8.2** | 67.3±1.4**                  | 71.6±2.3### |
| Total 12 $\alpha$ -OH BAs | 662±85                      | 11100±2100** | 380±34*                     | 511±66##   | 84.0±0.8                    | 83.9±2.0   | 75.0±2.1**                  | 83.5±0.9    |
| Total 6-OH BAs            | 89.3±14.1                   | 1400±317**   | 80.8±6.2                    | 59.6±6.6## | 11.2±0.6                    | 11.0±1.4   | 16.6±2.2*                   | 9.97±0.7    |

Data are presented as mean  $\pm$  SEM;  $n = 6$ /group. \* $P < 0.05$  or \*\* $P < 0.01$ , versus chow-treated *Ppara*<sup>+/+</sup> group, # $P < 0.05$  or ### $P < 0.01$ , versus Wy-treated *Ppara*<sup>+/+</sup> group, by one-way ANOVA followed by Tukey's *post-hoc* correction.



**Supplementary Table 4. Summary of hepatic concentration and composition of grouped BAs in *Ppara*<sup>fl/fl</sup> and *Ppara*<sup>ΔHep</sup> mice**

|                        | Concentration, nM             |           |                              |            | Percentage, %                 |            |                              |            |
|------------------------|-------------------------------|-----------|------------------------------|------------|-------------------------------|------------|------------------------------|------------|
|                        | <i>Ppara</i> <sup>fl/fl</sup> |           | <i>Ppara</i> <sup>ΔHep</sup> |            | <i>Ppara</i> <sup>fl/fl</sup> |            | <i>Ppara</i> <sup>ΔHep</sup> |            |
|                        | Chow                          | Wy        | Chow                         | Wy         | Chow                          | Wy         | Chow                         | Wy         |
| Total BAs              | 78.1±7.6                      | 72.6±10.5 | 83.9±13.0                    | 127±16.7#  | 100                           | 100        | 100                          | 100        |
| Total conjugated BAs   | 71.6±7.4                      | 69.2±10.3 | 76.3±11.3                    | 115±14.2#  | 91.4±1.1                      | 94.8±1.1   | 91.7±2.5                     | 85.7±2.1## |
| Total unconjugated BAs | 6.52±0.79                     | 4.18±0.94 | 7.59±3.06                    | 18.3±4.5#  | 8.56±1.1                      | 5.23±21.1  | 8.31±2.5                     | 14.2±2.1## |
| Total primary BAs      | 65.1±6.7                      | 62.8±9.2  | 68.0±10.6                    | 107±13.4#  | 83.2±1.0                      | 86.7±2.3   | 81.0±2.5                     | 78.9±1.4#  |
| Total secondary BAs    | 13.0±1.1                      | 10.5±1.9  | 15.9±3.5                     | 26.4±4.0## | 16.8±1.0                      | 13.3±2.3   | 19.0±2.5                     | 21.1±1.4#  |
| Total 12α-OH BAs       | 49.7±4.4                      | 50.1±6.7  | 48.8±6.1                     | 78.7±11.3  | 64.0±1.5                      | 70.6±2.5*  | 60.2±3.4                     | 57.0±2.5## |
| Total 6-OH BAs         | 24.3±3.3                      | 15.5±3.7  | 30.0±7.0                     | 47.1±6.1## | 30.5±1.8                      | 17.8±1.4** | 33.5±3.7                     | 37.7±2.6## |

Data are presented as mean ± SEM; *n* = 6/group. \**P* < 0.05 or \*\**P* < 0.01, versus chow-treated *Ppara*<sup>fl/fl</sup> group, #*P* < 0.05 or ##*P* < 0.01, versus Wy-treated *Ppara*<sup>fl/fl</sup> group, by one-way ANOVA followed by Tukey's *post-hoc* correction.

**Supplementary Table 5. Summary of hepatic concentration and composition of grouped BAs in *Ppara*<sup>+/+</sup> and *Ppara*<sup>-/-</sup> mice**

|                        | Concentration, nM           |           |                             |                         | Percentage, %               |            |                             |                        |
|------------------------|-----------------------------|-----------|-----------------------------|-------------------------|-----------------------------|------------|-----------------------------|------------------------|
|                        | <i>Ppara</i> <sup>+/+</sup> |           | <i>Ppara</i> <sup>-/-</sup> |                         | <i>Ppara</i> <sup>+/+</sup> |            | <i>Ppara</i> <sup>-/-</sup> |                        |
|                        | Chow                        | Wy        | Chow                        | Wy                      | Chow                        | Wy         | Chow                        | Wy                     |
| Total BAs              | 74.0±9.5                    | 81.3±9.0  | 61.8±5.0                    | 134±21#                 | 100                         | 100        | 100                         | 100                    |
| Total conjugated BAs   | 64.3±10.4                   | 76.4±8.8  | 57.3±5.3                    | 120±15#                 | 95.8±0.9                    | 93.9±0.7   | 92.7±1.7                    | 88.0±1.0 <sup>##</sup> |
| Total unconjugated BAs | 2.88±0.87                   | 4.84±0.59 | 4.54±0.75                   | 16.7±3.4 <sup>###</sup> | 4.18±0.93                   | 6.13±0.7   | 7.30±1.70                   | 12.0±1.0 <sup>##</sup> |
| Total primary BAs      | 63.3±7.99                   | 71.9±9.0  | 52.7±4.9                    | 120±13#                 | 85.8±1.2                    | 87.9±2.0   | 85.0±1.6                    | 82.1±1.4 <sup>#</sup>  |
| Total secondary BAs    | 10.7±1.8                    | 9.33±1.14 | 9.12±0.72                   | 25.1±5.2#               | 14.2±1.2                    | 12.1±2.0   | 15.0±1.6                    | 17.9±1.4 <sup>#</sup>  |
| Total 12α-OH BAs       | 41.3±6.1                    | 59.1±6.7  | 34.9±3.5                    | 88.1±10.4#              | 64.9±1.3                    | 73.0±2.4*  | 57.2±2.3*                   | 59.7±1.3 <sup>##</sup> |
| Total 6-OH BAs         | 20.2±3.4                    | 15.6±2.2  | 22.6±2.2                    | 48.4±8.2 <sup>##</sup>  | 29.8±1.2                    | 18.9±1.2** | 35.8±2.3*                   | 35.5±1.3 <sup>##</sup> |

Data are presented as mean ± SEM; *n* = 6/group. \**P* < 0.05 or \*\**P* < 0.01, versus chow-treated *Ppara*<sup>+/+</sup> group, #*P* < 0.05 or <sup>##</sup>*P* < 0.01, versus Wy-treated *Ppara*<sup>+/+</sup> group, by one-way ANOVA followed by Tukey's *post-hoc* correction.
